# Supplementary material for: Colorimetric detection of melamine in complex matrices based on cysteamine-modified gold nanoparticles
Source: Royal Society of Chemistry journal article supplement (doi:10.1039/c0an00432d), 2010-09-29
Supplement: c0an00432d.pdf [file c0an00432d.pdf]

## Supplementary Materials

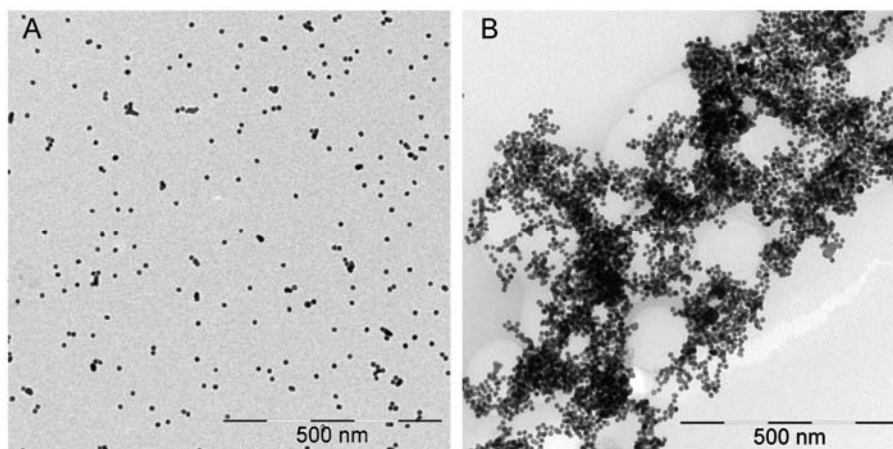

**Figure S1.** The TEM images of cysteamine modified 13 nm AuNPs in the absence (A) or the presence (B) of 10 mg/L melamine.

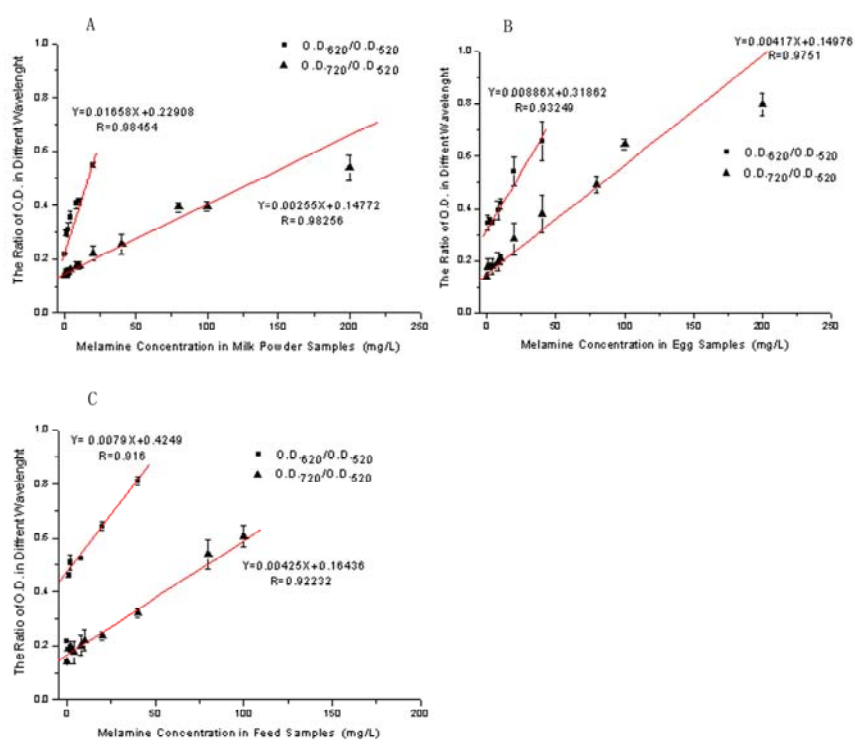

**Figure S2.** The calibration curve of melamine in spiked samples. Extinction ratios (A720/520 and A620/520) were plotted against melamine in milk powder (A), eggs (B), and adult dog food (C).
